# Supplementary material for: Inhibition of autotransporter biogenesis by small molecules
Source: PubMed Central journal article supplement — Mol Microbiol. 2019 May 3;112(1):81–98. doi: 10.1111/mmi.14255 (PMC6850105; doi:10.1111/mmi.14255), 2019-05-03
Supplement: MMI-112-81-s001.pdf [file MMI-112-81-s001.pdf]

# Supporting information

## Inhibition of autotransporter biogenesis by small molecules

Maurice Steenhuis<sup>1</sup>, Abdallah Abdallah<sup>2</sup>, Sabrina M. de Munnik<sup>3</sup>, Sebastiaan Kuhne<sup>3</sup>, Geert-Jan Sterk<sup>3</sup>, Bart van der Berg van Saparoea<sup>1</sup>, Sibel Westerhausen<sup>4</sup>, Samuel Wagner<sup>4,5</sup>, Nicole N. van der Wel<sup>6</sup>, Maikel Wijtmans<sup>3</sup>, Peter van Ulsen<sup>1</sup>, Wouter S. Jong<sup>1</sup> and Joen Luirink<sup>1,\*</sup>

<sup>1</sup>Department of Molecular Microbiology, Amsterdam Institute for Molecules Medicines and Systems (AIMMS), Vrije Universiteit, Amsterdam, the Netherlands

<sup>2</sup>Bioscience Core Laboratory, King Abdullah University of Science and Technology, Thuwal, Jeddah, Kingdom of Saudi Arabia

<sup>3</sup>Department of Chemistry and Pharmaceutical Sciences, Amsterdam Institute for Molecules Medicines and Systems (AIMMS), Vrije Universiteit, Amsterdam, the Netherlands

<sup>4</sup>Interfaculty Institute of Microbiology and Infection Medicine (IMIT), University of Tübingen, Tübingen, Germany

<sup>5</sup>German Center for Infection Research (DZIF), Tübingen, Germany

<sup>6</sup>Department of Medical Biology, Electron Microscopy Center Amsterdam, Academic Medical Center, University of Amsterdam, Amsterdam, the Netherlands

\*Corresponding author

[s.luirink@vu.nl](mailto:s.luirink@vu.nl)

[+31 \(0\)20 598 7175](tel:+31205987175)

## Contents

|                                                                                                                 |    |
|-----------------------------------------------------------------------------------------------------------------|----|
| Fig S1. VUF15259 does affect T5SS in <i>Salmonella</i> , but not T3SS. ....                                     | 3  |
| Fig S2. VUF15259 does not affect OmpA insertion and folding into proteoliposomes. ....                          | 4  |
| Fig S3. Synthetic approach to key compound VUF15259. ....                                                       | 5  |
| Fig S4. <sup>1</sup> H NMR spectrum of 1 (VUF15259) in DMSO-d <sub>6</sub> . ....                               | 6  |
| Fig S5. <sup>13</sup> C NMR spectrum of 1 (VUF15259) in DMSO-d <sub>6</sub> . ....                              | 7  |
| Fig S6. COSY spectrum of 1 (VUF15259) in DMSO-d <sub>6</sub> . ....                                             | 8  |
| Fig S7. HSQC spectrum of 1 (VUF15259) in DMSO-d <sub>6</sub> . ....                                             | 9  |
| Fig S8. HRMS spectrum of 1 (VUF15259). ....                                                                     | 10 |
| Fig S9. LC-MS analysis of 1 (VUF15259). ....                                                                    | 11 |
| Fig S10. Effect of temperature on the <sup>1</sup> H-NMR spectrum of 1 (VUF15259) in DMSO-d <sub>6</sub> . .... | 12 |
| Table S1. Strains used in this study. ....                                                                      | 13 |
| Table S2. Plasmids used in this study. ....                                                                     | 14 |
| Table S3. Primers used in this study. ....                                                                      | 15 |
| References .....                                                                                                | 16 |

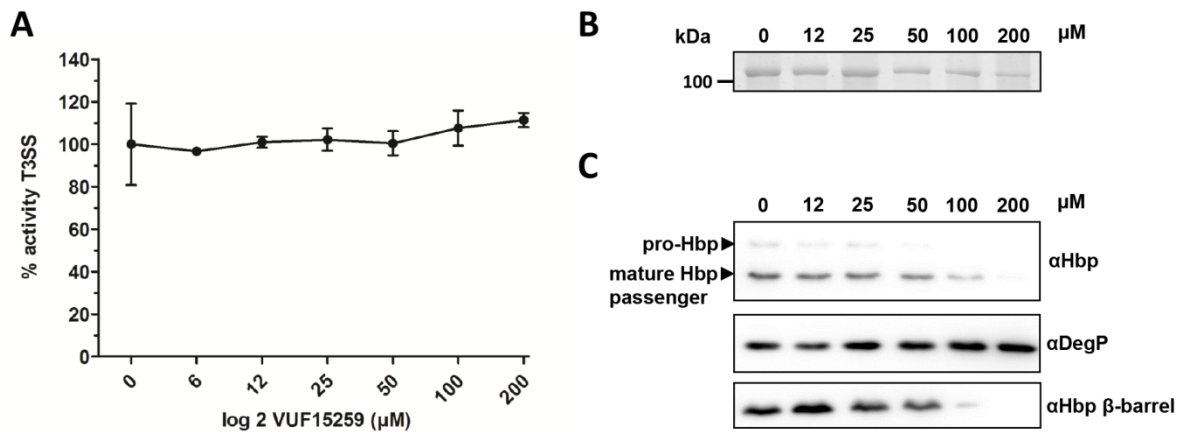

**Fig S1. VUF15259 does affect T5SS in *Salmonella*, but not T3SS.**

(A) *S. typhimurium* T3SS-dependent secretion was monitored by using a C-terminal NanoLuc (NL) luciferase (Hall *et al.*, 2012) fusion of the T3SS effector protein SipA. *S. typhimurium* cells were grown in a 384-well plate in the presence of different concentrations of VUF15259. After 5 h, cells were removed by washing the wells, leaving the secreted SipA-NL bound to the walls of the high protein-binding plate to allow luminescence detection. The solvent DMSO served as positive control (the average set to 100% secretion activity) and a *S. typhimurium*  $\Delta invA$  mutant, which is deficient in T3SS-dependent secretion, served as negative control (set to 0% secretion activity). Error bars represent the standard deviation of triplicate samples. (B) *S. typhimurium* T5SS-dependent secretion was monitored upon growth in a 96-well plate and incubation with the indicated VUF15259 concentrations. Hbp was expressed from the pEH3 plasmid by adding 40 µM IPTG. After 3 h cells were separated from spent medium by centrifugation. The spent medium was TCA precipitated and analyzed by SDS-PAGE and Coomassie staining. Secretion of Hbp appeared impaired by VUF15259 as indicated by a dose-dependent decrease in the amount of secreted Hbp passenger. (C) Cells were analyzed by SDS-PAGE and western blotting. In agreement with the inhibitory effect of VUF15259 on Hbp secretion we observed a dose-dependent decrease in mature Hbp passenger and corresponding  $\beta$ -barrel domain. Accumulation of pro-Hbp was not detected, most likely due to degradation by the protease DegP that appeared upregulated.

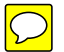

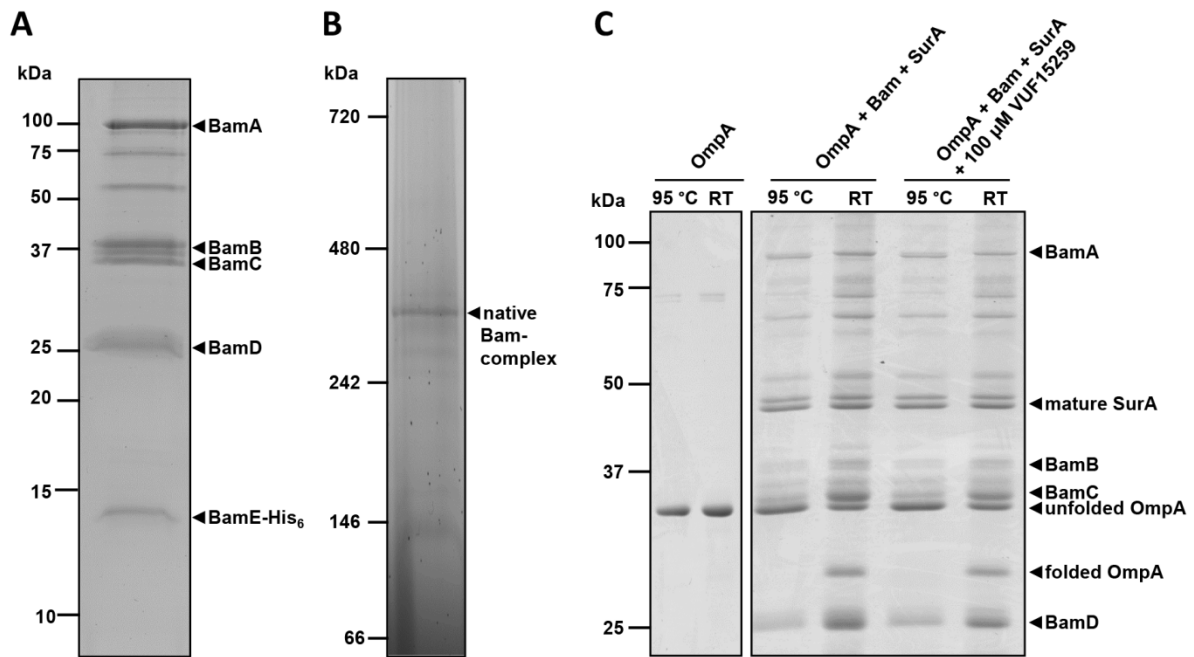

**Fig S2. VUF15259 does not affect OmpA insertion and folding into proteoliposomes.**

*E. coli* BL21 (DE3) strain harboring expression plasmids for all Bam subunits were grown, induced with 0.4 mM IPTG at mid log phase and growth was continued for 2 h. Cells were separated from medium by centrifugation and an enriched outer membrane fraction was isolated. The Bam-complex was purified from this fraction using Ni-NTA resin making use of a His<sub>6</sub>-tag fused to BamE. Elution fractions were pooled and analyzed by (A) 15% SDS-PAGE and Coomassie staining, and (B) 3-12% Blue-native PAGE. Of note, BamA degradation products were observed between 50 and 75 kDa. The native Bam-complex was detected between 480 and 242 kDa as reported (Roman-Hernandez, Peterson, & Bernstein, 2014). (C) The Bam-complex was incorporated into liposomes and the resulting proteoliposomes were used to monitor insertion and folding of OmpA. OmpA was cloned and expressed without its ss from the pET22b plasmid resulting in inclusion bodies that were isolated and dissolved in 8 M urea to completely denature OmpA. SurA was expressed from the pET22b plasmid and purified using a C-terminal His<sub>6</sub>-tag. Urea-denatured OmpA was pre-incubated with SurA for 20 min following a 2 h incubation at 30 °C in the presence of empty liposomes or proteoliposomes that were pre-incubated with VUF15259 or DMSO. The samples were analyzed by semi-native SDS-PAGE. To examine folding of OmpA the heat-modifiability of OmpA was tested by incubating the samples either at room temperature (RT) or at 95 °C for 10 min. BamE is not visible on this gel, due to the low molecular mass of the protein.

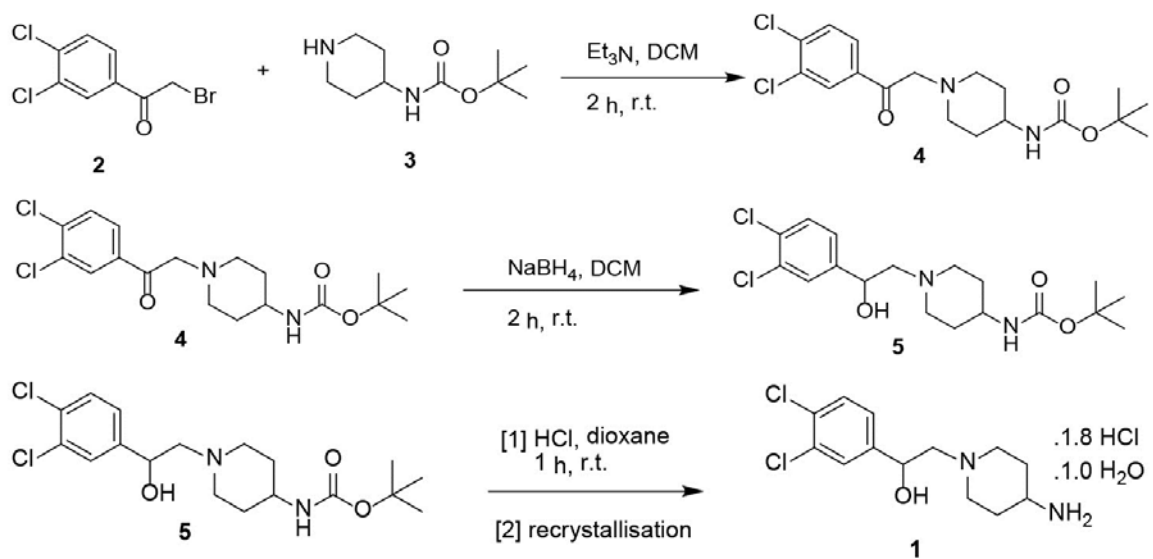

**Fig S3. Synthetic approach to key compound VUF15259.**

Detailed procedures are described in the materials and methods section.

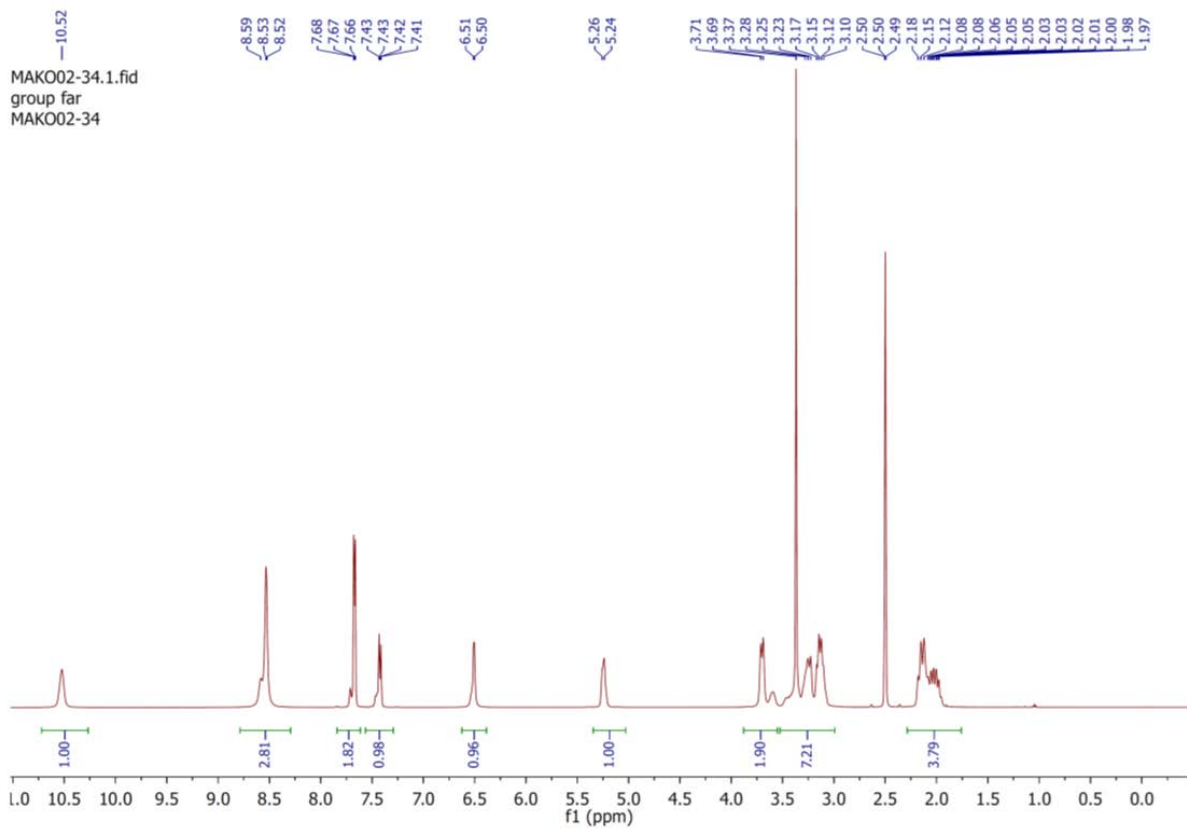

Fig S4.  $^1\text{H}$  NMR spectrum of **1** (VUF15259) in  $\text{DMSO-d}_6$ .

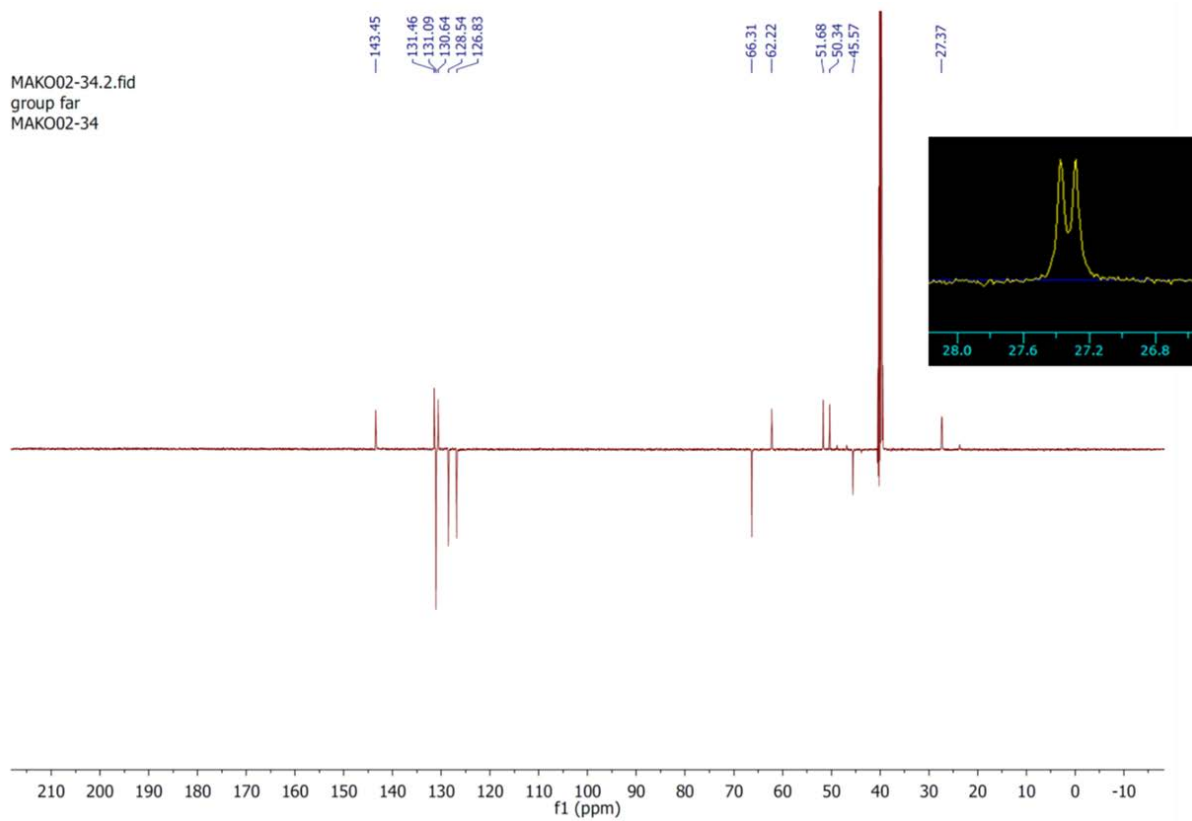

**Fig S5.**  $^{13}\text{C}$  NMR spectrum of **1** (VUF15259) in  $\text{DMSO-d}_6$ .

The inset shows a blow-up of the 28.0-26.8 region to highlight two almost overlapping signals.

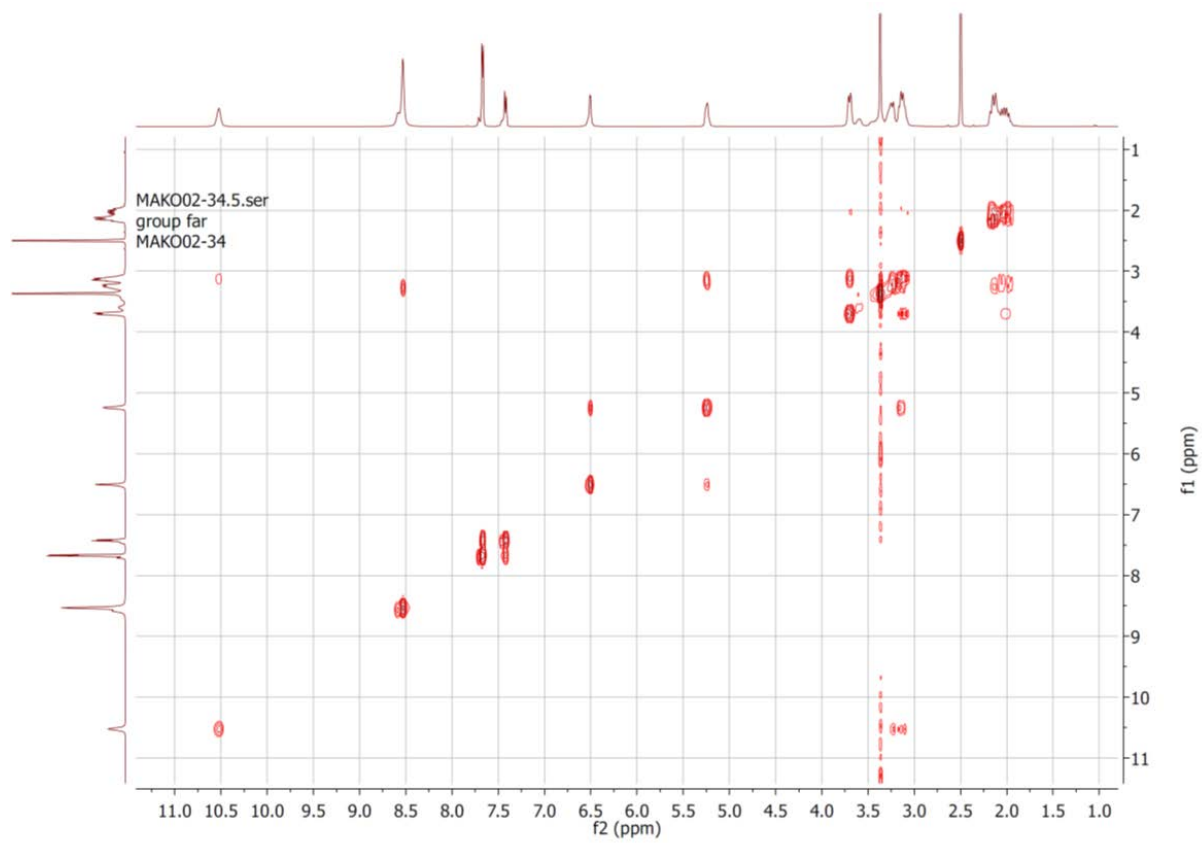

Fig S6. COSY spectrum of 1 (VUF15259) in DMSO-d<sub>6</sub>.



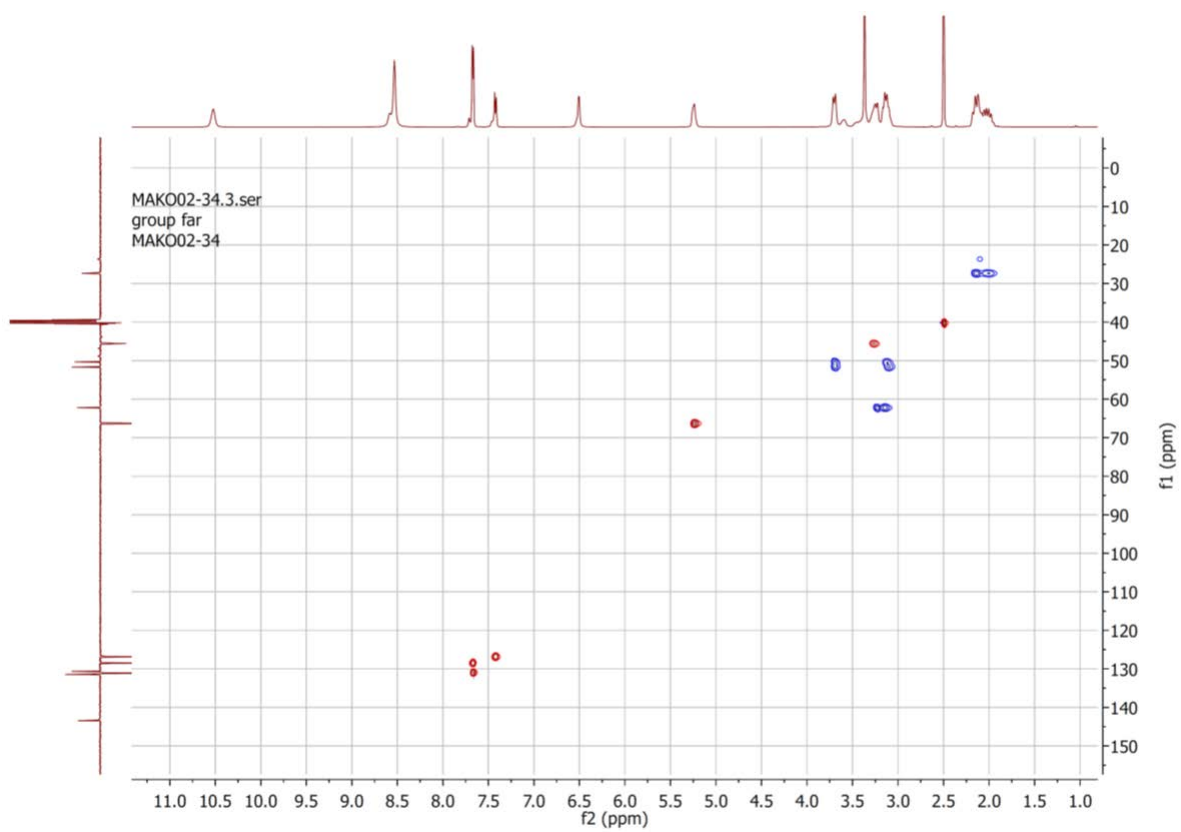

Fig S7. HSQC spectrum of 1 (VUF15259) in DMSO-d6.

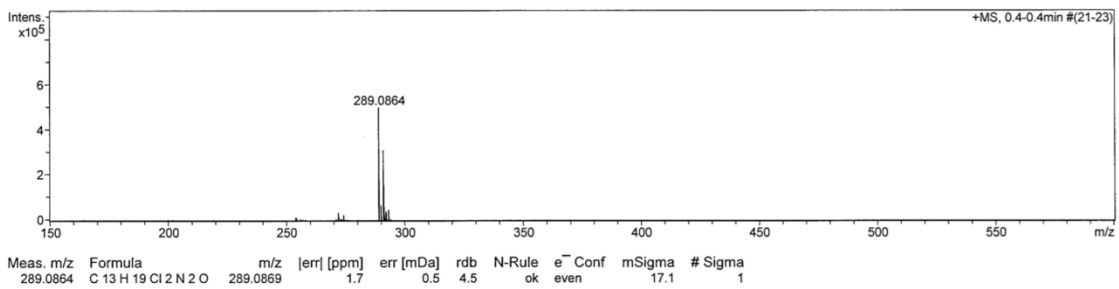

**Fig S8. HRMS spectrum of 1 (VUF15259).**

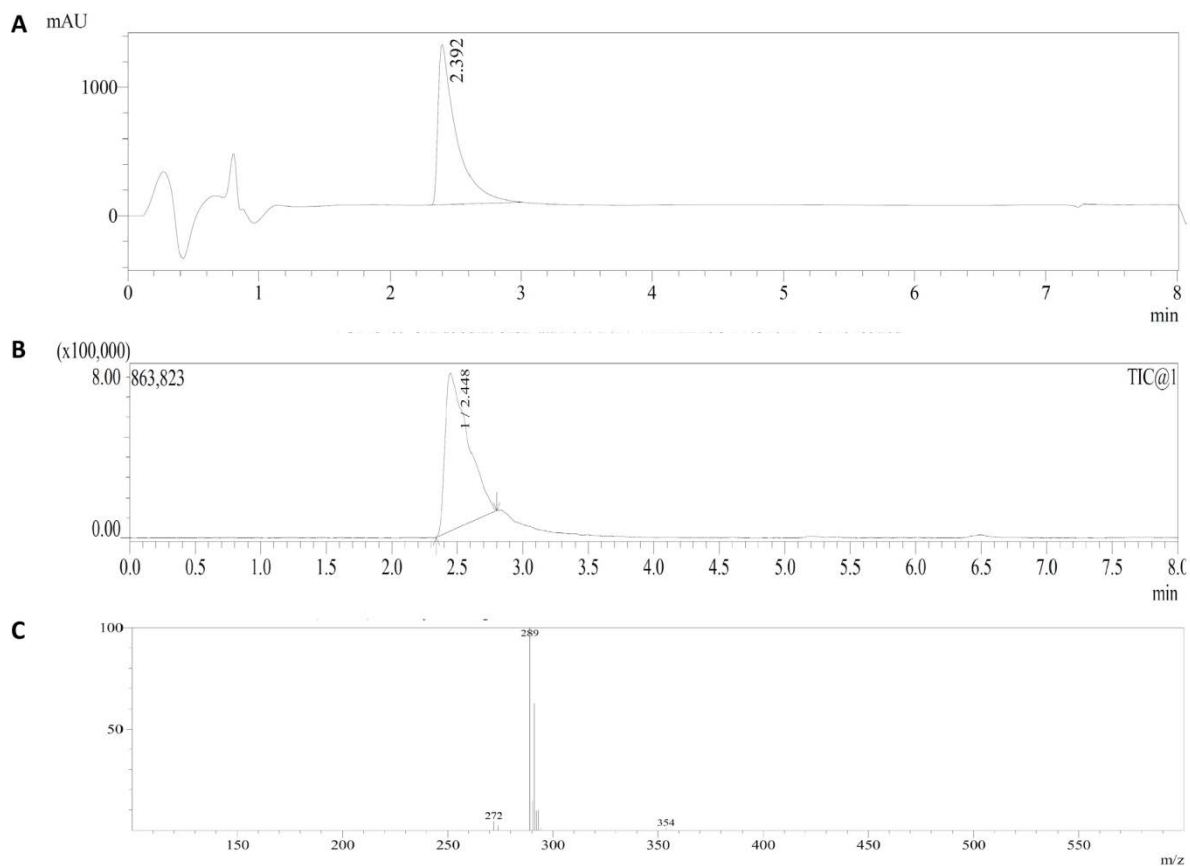

**Fig S9. LC-MS analysis of 1 (VUF15259).**

(A) UV detection at 230 nm. A relatively high solvent front due to the very low epsilon value of compound 1 is visible and cannot be avoided. (B) TIC MS detection. (C) ESI-MS spectrum of main eluted peak.

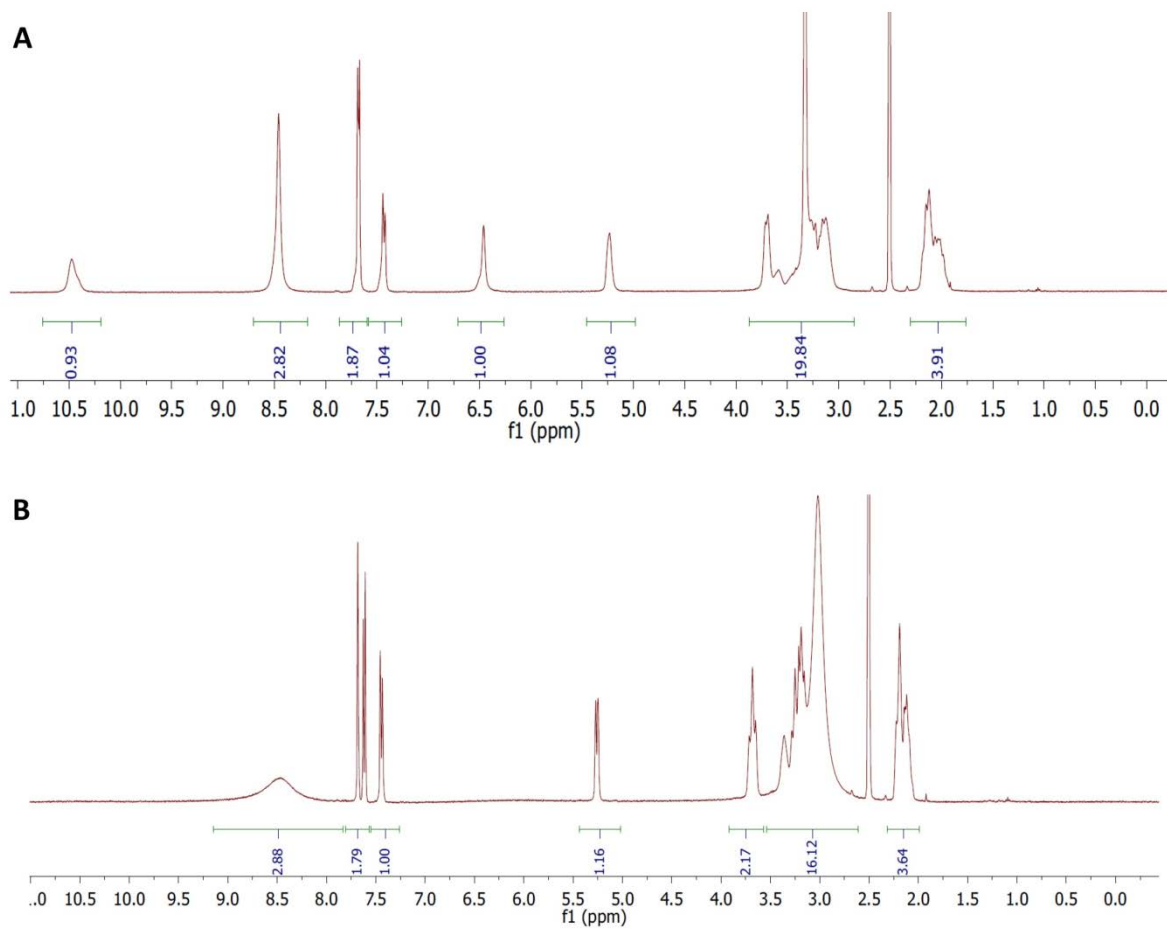

**Fig S10. Effect of temperature on the  $^1\text{H-NMR}$  spectrum of 1 (VUF15259) in DMSO- $d_6$ .**

(A) Room temperature. (B) 100 °C. Note: these spectra were recorded on a different batch of the compound than the batch shown in all the other spectral figures.

**Table S1. Strains used in this study.**

| <b><i>E. coli</i> strain</b>                          | <b>Description</b>                                            | <b>Reference</b>                         |
|-------------------------------------------------------|---------------------------------------------------------------|------------------------------------------|
| MC1061                                                | Cloning and expression strain                                 | Thermo Scientific                        |
| MC1061<br><i>degP::S210A</i>                          | Mutation rendering DegP defective in its protease function    | (Spiess, Beil, & Ehrmann, 1999)          |
| TOP10F'                                               | Cloning and expression strain                                 | Thermo Scientific                        |
| MC4100                                                | Cloning and expression strain                                 | (Taschner, Huls, Pas, & Woldringh, 1988) |
| MC4100 $\Delta$ <i>surA</i>                           | Deletion of the chaperone <i>surA</i>                         | (Baba <i>et al.</i> , 2006)              |
| MC4100 $\Delta$ <i>bamB</i>                           | Deletion of the protein <i>bamB</i>                           | (Baba <i>et al.</i> , 2006)              |
| MC4100<br>$\Delta$ <i>surA</i> / $\Delta$ <i>bamB</i> | Deletion of the chaperone <i>surA</i> and protein <i>bamB</i> | (Baba <i>et al.</i> , 2006)              |
| KS272                                                 | Parent strain KS474                                           | (Strauch & Beckwith, 1988)               |
| KS474 $\Delta$ <i>degP</i>                            | Deletion of the protease <i>degP</i>                          | (Strauch & Beckwith, 1988)               |
| BL21 (DE3)                                            | Cloning and expression strain                                 | Novagen                                  |

**Table S2. Plasmids used in this study.**

| Plasmid name                | Description                                                                    | Reference                                 |
|-----------------------------|--------------------------------------------------------------------------------|-------------------------------------------|
| pEH3                        | Expression vector; <i>lacUV5</i> promoter                                      | (Hashemzadeh-Bonehi <i>et al.</i> , 1998) |
| pEH3-Hbp                    | $P_{lac}$ - <i>hbp</i>                                                         | (Jong <i>et al.</i> , 2007)               |
| pEH3-Hbp110C/348C           | $P_{lac}$ - <i>hbp110C/348C</i>                                                | (Jong <i>et al.</i> , 2007)               |
| pEH3-ssTorA-Hbp             | $P_{lac}$ - <i>hbp</i> with <i>torA</i> signal sequence                        | (Jong <i>et al.</i> , 2017)               |
| pEH3-PhoE                   | $P_{lac}$ - <i>phoE</i>                                                        | (Jong <i>et al.</i> , 2010)               |
| pEH3-Antigen-43             | $P_{lac}$ - <i>antigen-43</i>                                                  | This study                                |
| pEH3-RpoE                   | $P_{lac}$ - <i>rpoE</i>                                                        | This study                                |
| pUA66                       | Cloning vector containing <i>gfpmut2</i>                                       | (Zaslaver <i>et al.</i> , 2006)           |
| pUA66-RpoE-NeonGreen        | $P_{rpoE}$ - <i>neongreen</i>                                                  | This study                                |
| pUA66-GroES-NeonGreen       | $P_{groES}$ - <i>neongreen</i>                                                 | This study                                |
| pET-BamCDE-His <sub>6</sub> | Expression vector for <i>bamC</i> , <i>bamD</i> and <i>bamE</i> under $P_{T7}$ | This study                                |
| pCDF-BamAB                  | Expression vector for <i>bamA</i> and <i>bamB</i> under $P_{T7}$               | This study                                |
| pET22b-SurA                 | $P_{T7}$ - <i>surA</i> -His <sub>6</sub> (21-408)                              | This study                                |
| pET22b-OmpA                 | $P_{T7}$ - <i>ompA</i> (22-346)                                                | This study                                |
| pLEMO                       | Expression of T7 lysozyme under $P_{Rha}$                                      | (Schlegel <i>et al.</i> , 2013)           |

**Table S3. Primers used in this study.**

| Primer <sup>†</sup>            | Sequence (5' → 3') <sup>‡</sup>                                    |
|--------------------------------|--------------------------------------------------------------------|
| <i>mNeonGreen</i> fw optimized | gacttctagatttaagaaggagatatacatatggt <u>aag</u> taaagg <u>tgaag</u> |
| <i>mNeonGreen</i> rv           | tca <u>gctctagagctt</u> gcatgcctgcaggctggacatttagaattcctgtacagctc  |
| <i>PrpoE</i> fw                | tcgactcgagcagcatgacaaacaaaaac                                      |
| <i>PrpoE</i> rv                | tgcaggatccttagctgcaatttgagcaagc                                    |
| <i>PgroES</i> fw               | tcgactcgagctgatcagaatttttttcttttc                                  |
| <i>PgroES</i> rv               | tgcaggatcctacgtggtttcccggctgg                                      |
| <i>rpoE</i> fw                 | actgggatccatgagcagcagttaacgg                                       |
| <i>rpoE</i> rv                 | atcgggtacctcaacgcctgataagcgg                                       |
| <i>antigen-43</i> fw           | taactttctagattacaaaacttaggagggtttttaccatgaaacgacatctgaatacc        |
| <i>antigen-43</i> rv           | gactgaattcggatcctcagaaggtcacattcagtgtg                             |
| <i>bamA</i> FW                 | atatcatatggcgatgaaaaagttgc                                         |
| <i>bamA</i> RV                 | atatagatccttaccaggttttaccgatgttaaac                                |
| <i>bamB</i> FW                 | atatccatgggattgcgtaaattactgctgc                                    |
| <i>bamB</i> RV                 | atataagcttttaacgtgtaatagagtacacggttcc                              |
| <i>bamC</i> FW                 | atatccatggcttactctgttcaaaagtc                                      |
| <i>bamC</i> RV                 | atataagcttttacttgctaaacgcagc                                       |
| <i>bamD</i> FW                 | atatcatatgacgcgatgaaatatctg                                        |
| <i>bamD</i> RV                 | atatagatccttatgtattgctgctgtttgc                                    |
| <i>bamE</i> FW                 | atatagatccttataagaaggagatactagtatgcgctgtaaaacgctg                  |
| <i>bamE-His<sub>6</sub></i> RV | atatctcgagttagtgatgatgatgatgatgatgatggttaccactcagcgcagg            |
| <i>surA</i> FW                 | tcgacatatgccccaggtagtcgataaaagtcg                                  |
| <i>surA</i> RV                 | atatctcgaggttgctcaggattttaacgtagg                                  |
| <i>ompA</i> FW                 | tcgacatatggactacaaagacgatgacgacaaggctccgaaagataaacctg              |
| <i>ompA</i> RV                 | tcgactcgagttaagcctgcggctgag                                        |

<sup>†</sup>FW: forward; RV: reverse

<sup>‡</sup>Restriction sites used for cloning are underlined and C/G to A/T substitution are depicted in red

## References

- Baba, T., Ara, T., Hasegawa, M., Takai, Y., Okumura, Y., Baba, M., Datsenko, K. A., Tomita, M., Wanner, B. L., & Mori, H. (2006). Construction of *Escherichia coli* K-12 in-frame, single-gene knockout mutants: The Keio collection. *Molecular Systems Biology*. doi: 10.1038/msb4100050
- Hall, M. P., Unch, J., Binkowski, B. F., Valley, M. P., Butler, B. L., Wood, G., Machleidt, T. (2012). Engineered luciferase reporter from a deep sea shrimp utilizing a novel imidazopyrazinone substrate. *ACS Chemical Biology*, 7(11), 1848-1857.
- Hashemzadeh-Bonehi, L., Mehraein-Ghomi, F., Mitsopoulos, C., Jacob, J. P., Hennessey, E. S., & Broome-Smith, J. K. (1998). Importance of using *lac* rather than *ara* promoter vectors for modulating the levels of toxic gene products in *Escherichia coli*. *Molecular Microbiology*, 30(3), 676–678.
- Jong, W. S. P., Ten Hagen-Jongman, C. M., Den Blaauwen, T., Jan Slotboom, D., Tame, J. R. H., Wickström, D., De Gier, J. W., Otto, B. R., & Luirink, J. (2007). Limited tolerance towards folded elements during secretion of the autotransporter Hbp. *Molecular Microbiology*, 63(5), 1524–1536.
- Jong, W. S. P., ten Hagen-Jongman, C. M., Ruijter, E., Orru, R. V. A., Genevoux, P., & Luirink, J. (2010). YidC is involved in the biogenesis of the secreted autotransporter hemoglobin protease. *The Journal of Biological Chemistry*, 285(51), 39682–90.
- Jong, W. S. P., Vikström, D., Houben, D., Berg van Saparoea, H. B., Gier, J. W., & Luirink, J. (2017). Application of an *E. coli* signal sequence as a versatile inclusion body tag. *Microbial Cell Factories*, 16(1), 1–13.
- Roman-Hernandez, G., Peterson, J. H., & Bernstein, H. D. (2014). Reconstitution of bacterial autotransporter assembly using purified components. *eLife*. doi: 10.7554/eLife.04234
- Schlegel, S., Rujas, E., Ytterberg, A. J., Zubarev, R. A., Luirink, J., & de Gier, J. W. (2013). Optimizing heterologous protein production in the periplasm of *E. coli* by regulating gene expression levels. *Microbial Cell Factories*. doi: 10.1186/1475-2859-12-24.
- Spieß, C., Beil, A., & Ehrmann, M. (1999). A temperature-dependent switch from chaperone to protease in a widely conserved heat shock protein. *Cell*, 97(3), 339–347.
- Strauch, K. L., & Beckwith, J. (1988). An *Escherichia coli* mutation preventing degradation of abnormal periplasmic proteins. *Proceedings of the National Academy of Sciences of the United States of America*, 85(5), 1576–80.
- Taschner, P. E., Huls, P. G., Pas, E., & Woldringh, C. L. (1988). Division behavior and shape changes in isogenic *ftsZ*, *ftsQ*, *ftsA*, *pbpB*, and *ftsE* cell division mutants of *Escherichia coli* during temperature shift experiments. *Journal of Bacteriology*, 170(4), 1533–1540.
- Zaslaver, A., Bren, A., Ronen, M., Itzkovitz, S., Kikoin, I., Shavit, S., Liebermeister W, Surette, M. G., & Alon, U. (2006). A comprehensive library of fluorescent transcriptional reporters for *Escherichia coli*. *Nature Methods*, 3(8), 623–628.
